# Supplementary material
Source: publisher figshare collection journal article supplement (https://asha.figshare.com/articles/dataset/_/19686510)

## Supplemental Material S1. Visual analog scale for recording scales. (A) Question and scale for a /s/ word. (B) Question and scale for a /ʃ/ word.

- A** Listen to the following word. You can listen to the recording as many times as you please. Please mark on the sliding scale how clear the initial /s/ sound is.

Word: see

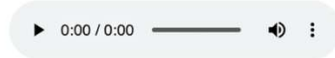

Completely clear /s/ 0 50 Severely distorted /s/ 100

Please mark on the sliding scale how clear the initial /s/ sound is.

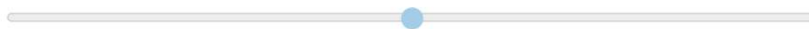

- B** Listen to the following word. You can listen to the recording as many times as you please. Please mark on the sliding scale how clear the initial /sh/ sound is.

Word: she

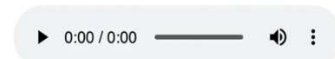

Completely clear /sh/ 0 50 Severely distorted /sh/ 100

Please mark on the sliding scale how clear the initial /sh/ sound is.

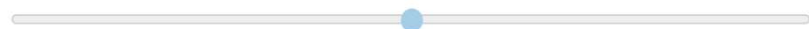

Supplement: Supplementary file 1 [file 1]
