# Supplementary material
Source: publisher figshare collection journal article supplement (https://asha.figshare.com/articles/dataset/_/19686510)
Supplement: Supplementary file 2 [file 1]

**Supplemental Material S2.** Word list for speech evaluations.

| Word  | Vowel | Sound |
|-------|-------|-------|
| Chap  | /a/   | /ch/  |
| Cheap | /i/   | /ch/  |
| Chew  | /u/   | /ch/  |
| Chop  | /a/   | /ch/  |
| Cap   | /æ/   | /k/   |
| Coo   | /u/   | /k/   |
| Cop   | /a/   | /k/   |
| Key   | /i/   | /k/   |
| Sack  | /æ/   | /s/   |
| See   | /i/   | /s/   |
| Sock  | /a/   | /s/   |
| Sue   | /u/   | /s/   |
| Shack | /æ/   | /ʃ/   |
| She   | /i/   | /ʃ/   |
| Shock | /a/   | /ʃ/   |
| Shoe  | /u/   | /ʃ/   |
| Tap   | /æ/   | /t/   |
| Tea   | /i/   | /t/   |
| Too   | /u/   | /t/   |
| Top   | /a/   | /t/   |
