# Supplementary material
Source: publisher figshare collection journal article supplement (https://asha.figshare.com/articles/dataset/_/19686510)
Supplement: Supplementary file 3 [file 1]

**Supplemental Material S3.** Class III DFD patient and recording demographics for /t/ and /k/.

| Group                                    | DFD ID  | Sex^ | Age   | Race* | Ethnicity** | /t/   | /k/  | /t/-/k/ |
|------------------------------------------|---------|------|-------|-------|-------------|-------|------|---------|
| Class III: Low Spectral Distinction      | DFD_124 | M    | 15    | C     | NH          | 10.17 | 7.35 | 2.82    |
|                                          | DFD_144 | M    | 15    | C     | H           | 9.36  | 7.59 | 1.78    |
|                                          | DFD_190 | M    | 17    | AA    | NH          | 5.94  | 4.96 | 0.98    |
|                                          | DFD_201 | M    | 23    | AA    | NH          | 6.47  | 7.27 | −0.79   |
| Mean                                     | NA      | NA   | 17.5  | NA    | NA          | 7.99  | 6.79 | 1.20    |
| Range                                    | NA      | NA   | 15–23 | NA    | NA          | 4.23  | 2.62 | 3.61    |
| Class III: Moderate Spectral Distinction | DFD_123 | M    | 16    | C     | NH          | 9.24  | 9.10 | 0.14    |
|                                          | DFD_159 | M    | 15    | C     | H           | 10.20 | 7.16 | 3.04    |
|                                          | DFD_167 | M    | 19    | AA    | NH          | 10.59 | 8.50 | 2.09    |
| Mean                                     | NA      | NA   | 16.7  | NA    | NA          | 10.01 | 8.25 | 1.76    |
| Range                                    | NA      | NA   | 15–19 | NA    | NA          | 1.35  | 1.94 | 2.90    |
| Class III: High Spectral Distinction     | DFD_108 | F    | 28    | AA    | NH          | 8.37  | 7.77 | 0.61    |
|                                          | DFD_145 | F    | 34    | AA    | NH          | 10.76 | 7.40 | 3.35    |
|                                          | DFD_171 | F    | 31    | C     | NH          | 8.35  | 6.86 | 1.49    |
|                                          | DFD_250 | F    | 23    | AA    | NH          | 9.78  | 8.70 | 1.08    |
| Mean                                     | NA      | NA   | 29    | NA    | NA          | 9.31  | 7.68 | 1.63    |
| Range                                    | NA      | NA   | 23–34 | NA    | NA          | 2.40  | 1.84 | 2.75    |
| Control                                  | DFD_099 | F    | 33    | C     | NH          | 8.11  | 9.33 | −1.22   |
|                                          | DFD_100 | F    | 34    | C     | NH          | 6.73  | 8.26 | −1.53   |
|                                          | DFD_102 | F    | 23    | C     | NH          | 9.80  | 7.17 | 2.63    |
|                                          | DFD_173 | F    | 26    | A     | NH          | 7.65  | 7.48 | 0.17    |

|       |         |    |       |    |    |      |      |       |
|-------|---------|----|-------|----|----|------|------|-------|
|       | DFD_233 | F  | 20    | C  | NH | 6.73 | 8.99 | -2.26 |
|       | DFD_237 | F  | 22    | C  | NH | 8.17 | 7.08 | 1.09  |
|       | DFD_241 | F  | 19    | A  | NH | 8.41 | 7.93 | 0.48  |
|       | DFD_243 | F  | 19    | C  | NH | 8.72 | 5.76 | 2.96  |
| Mean  | NA      | NA | 24.5  | NA | NA | 8.04 | 7.75 | 0.29  |
| Range | NA      | NA | 19–34 | NA | NA | 3.07 | 3.57 | 5.22  |

^Sex: M = Male; F = Female.

\*Race: C = Caucasian; AA = African American; A = Asian.

\*\*Ethnicity: H = Hispanic; NH= Non-Hispanic.
