# Supplementary material
Source: publisher figshare collection journal article supplement (https://asha.figshare.com/articles/dataset/_/19686510)
Supplement: Supplementary file 4 [file 1]

**Supplemental Material S4.** Correlation between mean word sounds between lay people and speech professionals.

| Sound | Pearson correlation coefficient | <i>p</i> value |
|-------|---------------------------------|----------------|
| /k/   | −0.12                           | .08            |
| /t/   | 0.02                            | .81            |
| /s/   | 0.09                            | .20            |
| /ʃ/   | 0.25                            | .0002*         |
