# Supplementary material
Source: publisher figshare collection journal article supplement (https://asha.figshare.com/articles/dataset/_/19686510)
Supplement: Supplementary file 5 [file 1]

**Supplemental Material S5.** Correlation between log10 mean word sounds between lay people and speech professionals.

| Sound | Pearson correlation coefficient | <i>p</i> value |
|-------|---------------------------------|----------------|
| /k/   | −0.25                           | .0002*         |
| /t/   | 0.02                            | .80            |
| /s/   | 0.15                            | .03            |
| /ʃ/   | 0.13                            | .06            |
